# Supplementary material for: AgIn5Se8: a defect diamond-like non-linear optical selenide
Source: Royal Society of Chemistry journal article supplement (doi:10.1039/d3qi00505d), 2023-01-01
Supplement: d3qi00505d1.pdf [file d3qi00505d1.pdf]

## ***Supporting Information for***

### **AgIn<sub>5</sub>Se<sub>8</sub>: a defect diamond-like nonlinear optical selenide**

*Linfeng Dong,<sup>a,d</sup> Shengzi Zhang,<sup>a,c</sup> Pifu Gong,<sup>\*,a</sup> Fei Liang,<sup>a</sup> and Zheshuai Lin<sup>\*,a,b</sup>*

<sup>a</sup> Functional Crystals Lab, Technical Institute of Physics and Chemistry, Chinese Academy of Sciences, Beijing 100190, China

<sup>b</sup> Center of Materials Science and Optoelectronics Engineering, University of Chinese Academy of Sciences, Beijing 100049, China

<sup>c</sup> National Institute of Metrology, Beijing 100029, China.

<sup>d</sup> University of Chinese Academy of Sciences, Beijing 100049, China

\* Email: pfgong@mail.ipc.ac.cn; zslin@mail.ipc.ac.cn

## **CONTENTS**

### **Experimental Method**

**Table S1.** Calculated NLO Properties of AgIn<sub>5</sub>Se<sub>8</sub>, LiIn<sub>5</sub>Se<sub>8</sub>, AgIn<sub>5</sub>S<sub>8</sub> and LiIn<sub>5</sub>S<sub>8</sub>--2

**Fig. S1.** Experiment powder X-ray diffraction pattern and calculated diffraction pattern of AgIn<sub>5</sub>Se<sub>8</sub>-----3

**Fig. S2.** Coordination environment of two sites of Se in AgIn<sub>5</sub>Se<sub>8</sub>-----3

**Fig. S3.** Density of states of AgIn<sub>5</sub>Se<sub>8</sub>-----4

**Table 1.** Calculated NLO Properties of  $\text{AgIn}_5\text{Se}_8$ ,  $\text{LiIn}_5\text{Se}_8$ ,  $\text{AgIn}_5\text{S}_8$  and  $\text{LiIn}_5\text{S}_8$ 

|                            | a(Å)  | c(Å)   | Band gap(eV) | $d_{36}$ (pm/V) | $\Delta n@1 \mu\text{m}$ |
|----------------------------|-------|--------|--------------|-----------------|--------------------------|
| $\text{AgIn}_5\text{Se}_8$ | 5.698 | 12.086 | 1.59         | 13.1            | 0.031                    |
| $\text{LiIn}_5\text{Se}_8$ | 5.676 | 11.782 | 2.08         | 12.9            | 0.029                    |
| $\text{AgIn}_5\text{S}_8$  | 5.437 | 11.659 | 2.01         | 6.4             | 0.036                    |
| $\text{LiIn}_5\text{S}_8$  | 5.426 | 11.266 | 2.64         | 6.7             | 0.020                    |

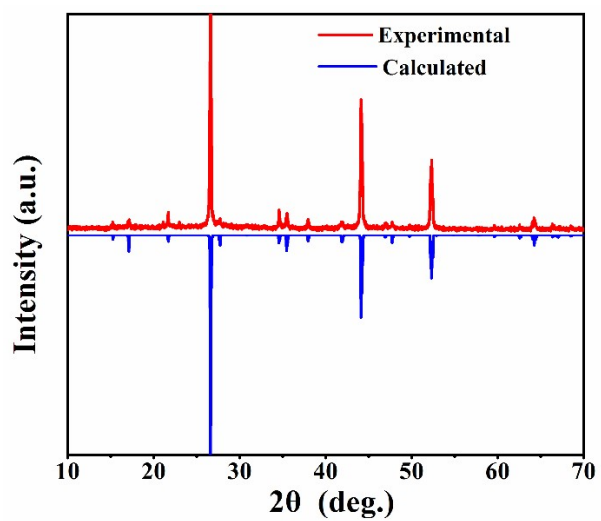

Figure S1 Experiment powder X-ray diffraction pattern and calculated diffraction pattern of  $\text{AgIn}_5\text{Se}_8$

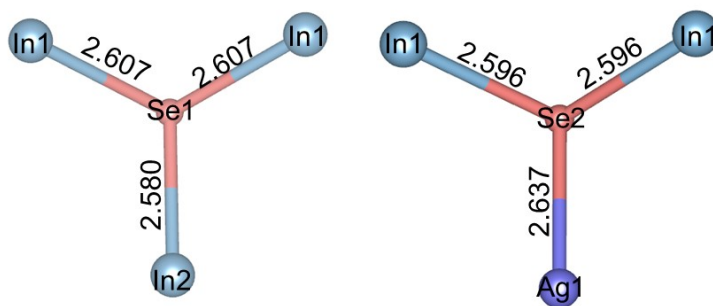

Figure S2 Coordination environment of two sites of Se in  $\text{AgIn}_5\text{Se}_8$

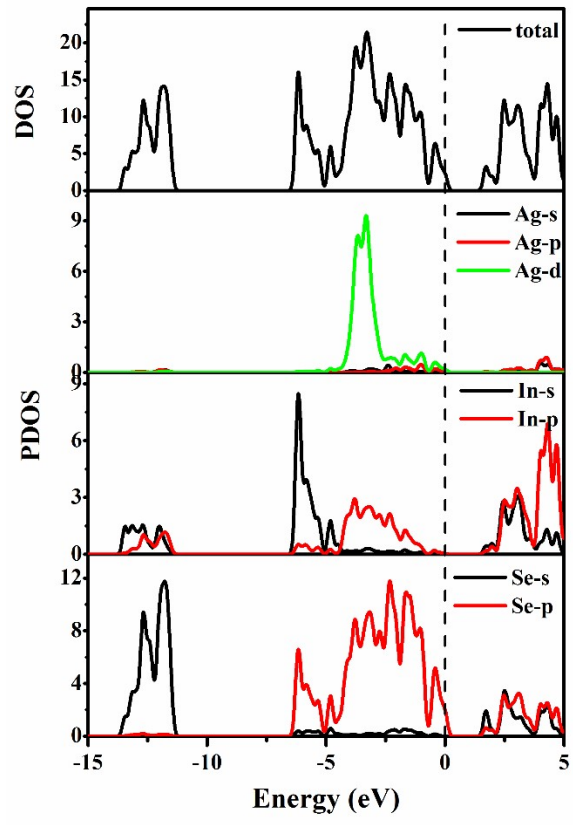

Figure S3 Density of states of  $\text{AgIn}_5\text{Se}_8$
